# Supplementary material for: Emergence of genotype Cosmopolitan of dengue virus type 2 and genotype III of dengue virus type 3 in Thailand
Source: PubMed Central journal article supplement (PMC6231660; doi:10.1371/journal.pone.0207220), 2018-11-12
Supplement: pone.0207220.s001.pdf [file pone.0207220.s001.pdf]

**S1 Table Primers used in this study.**

| Fragment | RT primer              | Sequence 5'-3'                                    | PCR primer                                                   | Sequence 5'-3'                                                                                    |
|----------|------------------------|---------------------------------------------------|--------------------------------------------------------------|---------------------------------------------------------------------------------------------------|
| DENV1-5  | d1a10 <sup>a</sup>     | TCTCTCYGGCTCRAAGAGGG                              | d1s1C <sup>a</sup><br>d1a10 <sup>a</sup>                     | <u>GATGAGGGAAGATGGGG</u> AGTTGTTAGTCTACGTGGAC<br>TCTCTCYGGCTCRAAGAGGG                             |
| DENV1-3  | d1a5B <sup>a</sup>     | <u>TTTGTCGGTCTGGGGGGTAT</u> AGAACCTGTTGATTCAACRGC | d1s12 <sup>a</sup><br>d1a5B <sup>a</sup>                     | AAATGGCAGAGGCGCTCAAGGG<br><u>TTTGTCGGTCTGGGGGGTAT</u> AGAACCTGTTGATTCAACRGC                       |
| DENV2-5  | DV2RT6817 <sup>b</sup> | TGCGGCCACCACTGTGAGGATGGC                          | T7-5TDVfWClal <sup>b</sup><br>DV2RvNheI6731NotI <sup>b</sup> | GGCATCGATTAATACGACTCACTATAGAGTTGTTAGTCTACGTGGAC<br>CGACAAAG<br>GGCGCGCCCGCAGCAAACTATGAGAAAAACTCCA |
| DENV2-3  | 3T DV Rv <sup>b</sup>  | AGAACCTGTTGATTCAACAGCACC                          | DV2FwClal6608NheI <sup>b</sup><br>3T-NotI DV Rv <sup>b</sup> | GGCATCGATAGGGAAGATGACCCTGGGAATGTG<br>GCCGCGCCCGCAGAACCCTGTTGATTCAACAGCACC                         |
| DENV3-5  | d3a11 <sup>a</sup>     | TTGGTCCAGCCAGGATCA                                | d3s1C <sup>a</sup><br>d3a11 <sup>a</sup>                     | <u>GATGAGGGAAGATGGGG</u> AGTTGTTAGTCTACGTGGAC<br>TTGGTCCAGCCAGGATCA                               |
| DENV3-3  | d3a5B <sup>a</sup>     | <u>TTTGTCGGTCTGGGGGGTAT</u> AGAACCTGTTGATTCAACAGC | d3a5B <sup>a</sup><br>d3s12 <sup>a</sup>                     | <u>TTTGTCGGTCTGGGGGGTAT</u> AGAACCTGTTGATTCAACAGC<br>GCTCATGGAATTCAGGCAAT                         |
| DENV4-5  | DV4-7148R <sup>c</sup> | ATTGCGTAATGGACTAAAAGCA                            | DV-1F <sup>c</sup><br>DV4-7130R <sup>c</sup>                 | AGTTGTTAGTCTACGTGGACCGACAA<br>AAGGTCGTTGGGTTCACTTG                                                |
| DENV4-3  | d4a5B <sup>a</sup>     | <u>TTTGTCGGTCTGGGGGGTAT</u> AGAACCTGTTGGATCAACAAC | DV4-6923F <sup>c</sup><br>d4a5B <sup>a</sup>                 | GGACGCTCTATGCAGTAGCC<br><u>TTTGTCGGTCTGGGGGGTAT</u> AGAACCTGTTGGATCAACAAC                         |

Underlying represent restriction sites or T7 promoter sequences that are not present in dengue virus genomes.

<sup>a</sup> Christenbury, J. G., 2010

<sup>b</sup> Kurosu, T., 2010

<sup>c</sup> designed in the present study
