# Supplementary material for: Emergence of genotype Cosmopolitan of dengue virus type 2 and genotype III of dengue virus type 3 in Thailand
Source: PubMed Central journal article supplement (PMC6231660; doi:10.1371/journal.pone.0207220), 2018-11-12
Supplement: pone.0207220.s002.pdf [file pone.0207220.s002.pdf]

S2 Table. Dengue virus sequences used in present study.

| Dataset                 | Serotype     | Genotype | Accession number | Country          | Year       |      |
|-------------------------|--------------|----------|------------------|------------------|------------|------|
| Genotype classification | DENV-1       |          | AF350498         | China            | 1980       |      |
|                         | DENV-1       | I        | AB074760         | Japan            | 1943       |      |
|                         | DENV-1       | I        | AY732483         | Thailand         | 1981       |      |
|                         | DENV-1       | I        | AY732481         | Thailand         | 1982       |      |
|                         | DENV-1       | I        | AY732477         | Thailand         | 1991       |      |
|                         | DENV-1       | I        | AY732475         | Thailand         | 1994       |      |
|                         | DENV-1       | I        | AY732479         | Thailand         | 2001       |      |
|                         | DENV-1       | I        | AY732482         | Thailand         | 2001       |      |
|                         | DENV-1       | I        | AY732480         | Thailand         | 2004       |      |
|                         | DENV-1       | I        | HG316481         | Thailand         | 2010       |      |
|                         | DENV-1       | I        | KF887994         | Thailand         | 2013       |      |
|                         | DENV-1       | I        | KX595191         | Viet Nam         | 2013       |      |
|                         | DENV-1       | II       | AF180517         | Thailand         | 1964       |      |
|                         | DENV-1       | III      | EF457905         | Malaysia         | 1972       |      |
|                         | DENV-1       | IV       | KT827366         | China            | 2007       |      |
|                         | DENV-1       | IV       | DQ672560         | French Polynesia | 2001       |      |
|                         | DENV-1       | IV       | AB189120         | Indonesia        | 1998       |      |
|                         | DENV-1       | IV       | KC762651         | Indonesia        | 2007       |      |
|                         | DENV-1       | IV       | GQ868602         | Philippines      | 2004       |      |
|                         | DENV-1       | IV       | DQ285560         | Reunion          | 2004       |      |
|                         | DENV-1       | V        | AF514889         | Argentina        | 2000       |      |
|                         | DENV-1       | V        | AF226685         | Brazil           | 1990       |      |
|                         | DENV-1       | V        | KF289072         | India            | 2011       |      |
|                         | DENV-1       | V        | AY722803         | Myanmar          | 1998       |      |
|                         | DENV-1       | V        | AY732474         | Thailand         | 1980       |      |
|                         | DENV-1       | V        | AY732478         | Thailand         | 1980       |      |
|                         | DENV-1       | VI       | KR919820         | Brunei           | 2014       |      |
|                         | DENV-2       | American |                  | AF119661         | China      | 1985 |
|                         | DENV-2       | American |                  | GQ868592         | Colombia   | 1986 |
|                         | DENV-2       | American |                  | HM582099         | Fiji       | 1971 |
|                         | DENV-2       | American |                  | HQ999999         | Guatemala  | 2009 |
|                         | DENV-2       | American |                  | KC294223         | Peru       | 2010 |
|                         | DENV-2       | Asian-I  |                  | FJ639104         | Cambodia   | 2003 |
|                         | DENV-2       | Asian-I  |                  | GU131932         | Cambodia   | 2008 |
|                         | DENV-2       | Asian-I  |                  | NC001474         | Thailand   | 1964 |
|                         | DENV-2       | Asian-I  |                  | GQ868542         | Thailand   | 1994 |
|                         | DENV-2       | Asian-I  |                  | DQ181798         | Thailand   | 1999 |
|                         | DENV-2       | Asian-I  |                  | FJ898452         | Thailand   | 2003 |
|                         | DENV-2       | Asian-I  |                  | KY586563         | Thailand   | 2006 |
|                         | DENV-2       | Asian-I  |                  | EU482784         | Viet Nam   | 2003 |
|                         | DENV-2       | Asian-I  |                  | JF730049         | Viet Nam   | 2007 |
|                         | DENV-2       | Asian-II |                  | AF204177         | China      | 1989 |
|                         | DENV-2       | Asian-II |                  | AF204178         | China      | 1987 |
|                         | DENV-2       | Asian-II |                  | GQ398268         | Indonesia  | 1975 |
|                         | DENV-2       | Asian-II |                  | AF038403         | New Guinea | 1944 |
| DENV-2                  | Asian-II     |          | HQ891024         | Taiwan           | 2008       |      |
| DENV-2                  | Asian-II     |          | JF730050         | USA              | 2007       |      |
| DENV-2                  | Cosmopolitan |          | AY037116         | Australia        | 1993       |      |
| DENV-2                  | Cosmopolitan |          | EU179857         | Brunei           | 2005       |      |
| DENV-2                  | Cosmopolitan |          | EU056810         | Burkina Faso     | 1983       |      |
| DENV-2                  | Cosmopolitan |          | AF359579         | China            | 1999       |      |
| DENV-2                  | Cosmopolitan |          | AF276619         | China            | 2000       |      |
| DENV-2                  | Cosmopolitan |          | F1196953         | China            | 2003       |      |
| DENV-2                  | Cosmopolitan |          | HM488257         | Guam             | 2001       |      |
| DENV-2                  | Cosmopolitan |          | JQ955624         | India            | 2011       |      |
| DENV-2                  | Cosmopolitan |          | JX475906         | India            | 2009       |      |
| DENV-2                  | Cosmopolitan |          | GQ398258         | Indonesia        | 1975       |      |
| DENV-2                  | Cosmopolitan |          | GQ398259         | Indonesia        | 1976       |      |
| DENV-2                  | Cosmopolitan |          | GQ398260         | Indonesia        | 1978       |      |
| DENV-2                  | Cosmopolitan |          | AB189122         | Indonesia        | 1998       |      |
| DENV-2                  | Cosmopolitan |          | AY858035         | Indonesia        | 2004       |      |
| DENV-2                  | Cosmopolitan |          | KJ010186         | Pakistan         | 2013       |      |
| DENV-2                  | Cosmopolitan |          | EU081177         | Singapore        | 2005       |      |
| DENV-2                  | Cosmopolitan |          | JF327392         | Singapore        | 2009       |      |
| DENV-2                  | Cosmopolitan |          | FJ862602         | Sri Lanka        | 1996       |      |
| DENV-2                  | Cosmopolitan |          | GQ252877         | Sri Lanka        | 2004       |      |
| DENV-2                  | Cosmopolitan |          | DQ645546         | Taiwan           | 2002       |      |
| DENV-2                  | Cosmopolitan |          | EU482672         | Viet Nam         | 2006       |      |
| DENV-3                  | I            |          | JN406515         | Australia        | 2008       |      |
| DENV-3                  | I            |          | JQ920480         | French Polynesia | 1996       |      |
| DENV-3                  | I            |          | KC762686         | Indonesia        | 2007       |      |
| DENV-3                  | I            |          | JQ820485         | New Caledonia    | 1998       |      |
| DENV-3                  | I            |          | KU509279         | Philippines      | 2008       |      |
| DENV-3                  | I            |          | EU081223         | Singapore        | 2005       |      |
| DENV-3                  | I            |          | KX380839         | Singapore        | 2012       |      |
| DENV-3                  | II           |          | KC261634         | China            | 2012       |      |
| DENV-3                  | II           |          | GQ868593         | Thailand         | 1973       |      |
| DENV-3                  | II           |          | KU509280         | Thailand         | 2011       |      |
| DENV-3                  | III          |          | JX869490         | Brazil           | 2002       |      |
| DENV-3                  | III          |          | FJ882576         | Nicaragua        | 1994       |      |
| DENV-3                  | III          |          | KX380842         | Singapore        | 2013       |      |
| DENV-3                  | III          |          | GQ199887         | Sri Lanka        | 1983       |      |
| DENV-3                  | III          |          | NC_001475        | Sri Lanka        | 2000       |      |
| DENV-3                  | III          |          | DQ675531         | Taiwan           | 1998       |      |
| DENV-3                  | III          |          | FJ687448         | Thailand         | 2001       |      |
| DENV-3                  | III          |          | MF142763         | Thailand         | 2015       |      |
| DENV-3                  | III          |          | KF955460         | Viet Nam         | 2008       |      |
| DENV-3                  | IV           |          | L11433           | Puerto Rico      | 1963       |      |
| DENV-3                  | IV           |          | L11434           | Puerto Rico      | 1977       |      |
| DENV-3                  | IV           |          | L11439           | Tahiti           | 1965       |      |
| DENV-3                  | V            |          | EF829370         | Brazil           | 2002       |      |
| DENV-3                  | V            |          | JN697378         | Brazil           | 2006       |      |
| DENV-3                  | V            |          | AF317845         | China            | 1980       |      |
| DENV-3                  | V            |          | KM190937         | Philippines      | 1964       |      |
| DENV-3                  | V            |          | KU050695         | Philippines      | 1956       |      |
| DENV-3                  | V            |          | JQ922554         | USA              | 1963       |      |
| DENV-4                  | I            |          | JN638570         | Cambodia         | 2008       |      |
| DENV-4                  | I            |          | FJ196850         | China            | 1990       |      |
| DENV-4                  | I            |          | KU509287         | India            | 2009       |      |
| DENV-4                  | I            |          | KX845005         | India            | 2015       |      |
| DENV-4                  | I            |          | KF041260         | Pakistan         | 2009       |      |
| DENV-4                  | I            |          | KR011349         | Philippines      | 1956       |      |
| DENV-4                  | I            |          | KP792537         | Singapore        | 2011       |      |
| DENV-4                  | I            |          | AY618991         | Thailand         | 1977       |      |
| DENV-4                  | I            |          | AY618990         | Thailand         | 1991       |      |
| DENV-4                  | I            |          | AY618992         | Thailand         | 2001       |      |
| DENV-4                  | I            |          | KR922405         | Thailand         | 2011       |      |
| DENV-4                  | IIA          |          | JQ915083         | French Polynesia | 2007       |      |
| DENV-4                  | IIA          |          | KC762694         | Indonesia        | 2007       |      |
| DENV-4                  | IIA          |          | KU523871         | Philippines      | 2014       |      |
| DENV-4                  | IIA          |          | AY618993         | Thailand         | 2000       |      |
| DENV-4                  | IIIB         |          | KP188566         | Brazil           | 2013       |      |
| DENV-4                  | IIIB         |          | GQ868585         | Colombia         | 2005       |      |
| DENV-4                  | IIIB         |          | AF326573         | Dominican        | 1981       |      |
| DENV-4                  | IIIB         |          | JF262782         | Haiti            | 1994       |      |
| DENV-4                  | IIIB         |          | FJ850059         | Puerto Rico      | 1998       |      |
| DENV-4                  | IIIB         |          | FJ639773         | Venezuela        | 2001       |      |
| DENV-4                  | IIIB         |          | HQ332176         | Venezuela        | 2007       |      |
| DENV-4                  | III          |          | AY618989         | Thailand         | 1997       |      |
| DENV-4                  | III          |          | AY618988         | Thailand         | 1997       |      |
| DENV-4                  | III          |          | KY586945         | Thailand         | 1998       |      |
| DENV-4                  | III          |          | KY586946         | Thailand         | 1998       |      |

| DENV-2 Thailand | DENV-2 | Asian-I      | NC001474 | Thailand | 1964 |
|-----------------|--------|--------------|----------|----------|------|
|                 | DENV-2 | Asian-I      | DQ181816 | Thailand | 1974 |
|                 | DENV-2 | Asian-I      | GU28914  | Thailand | 1974 |
|                 | DENV-2 | Asian-I      | DQ181814 | Thailand | 1976 |
|                 | DENV-2 | Asian-I      | DQ181815 | Thailand | 1976 |
|                 | DENV-2 | Asian-I      | DQ181812 | Thailand | 1977 |
|                 | DENV-2 | Asian-I      | DQ181813 | Thailand | 1977 |
|                 | DENV-2 | Asian-I      | DQ181810 | Thailand | 1978 |
|                 | DENV-2 | Asian-I      | DQ181811 | Thailand | 1978 |
|                 | DENV-2 | Asian-I      | DQ181805 | Thailand | 1979 |
|                 | DENV-2 | Asian-I      | DQ181808 | Thailand | 1979 |
|                 | DENV-2 | Asian-I      | DQ181826 | Thailand | 1980 |
|                 | DENV-2 | Asian-I      | DQ181827 | Thailand | 1980 |
|                 | DENV-2 | Asian-I      | DQ181828 | Thailand | 1980 |
|                 | DENV-2 | Asian-I      | DQ181823 | Thailand | 1981 |
|                 | DENV-2 | Asian-I      | DQ181824 | Thailand | 1981 |
|                 | DENV-2 | Asian-I      | DQ181819 | Thailand | 1982 |
|                 | DENV-2 | Asian-I      | DQ181822 | Thailand | 1982 |
|                 | DENV-2 | Asian-I      | DQ181837 | Thailand | 1983 |
|                 | DENV-2 | Asian-I      | DQ181838 | Thailand | 1983 |
|                 | DENV-2 | Asian-I      | DQ181804 | Thailand | 1984 |
|                 | DENV-2 | Asian-I      | DQ181834 | Thailand | 1984 |
|                 | DENV-2 | Asian-I      | DQ181835 | Thailand | 1984 |
|                 | DENV-2 | Asian-I      | DQ181803 | Thailand | 1985 |
|                 | DENV-2 | Asian-I      | DQ181832 | Thailand | 1985 |
|                 | DENV-2 | Asian-I      | DQ181833 | Thailand | 1985 |
|                 | DENV-2 | Asian-I      | DQ181830 | Thailand | 1986 |
|                 | DENV-2 | Asian-I      | DQ181831 | Thailand | 1986 |
|                 | DENV-2 | Asian-I      | DQ181829 | Thailand | 1987 |
|                 | DENV-2 | Asian-I      | DQ181848 | Thailand | 1987 |
|                 | DENV-2 | Asian-I      | DQ181802 | Thailand | 1988 |
|                 | DENV-2 | Asian-I      | DQ181847 | Thailand | 1988 |
|                 | DENV-2 | Asian-I      | DQ181845 | Thailand | 1990 |
|                 | DENV-2 | Asian-I      | DQ181887 | Thailand | 1990 |
|                 | DENV-2 | Asian-I      | DQ181839 | Thailand | 1991 |
|                 | DENV-2 | Asian-I      | DQ181840 | Thailand | 1991 |
|                 | DENV-2 | Asian-I      | DQ181859 | Thailand | 1992 |
|                 | DENV-2 | Asian-I      | DQ181855 | Thailand | 1993 |
|                 | DENV-2 | Asian-I      | DQ181884 | Thailand | 1993 |
|                 | DENV-2 | Asian-I      | DQ181851 | Thailand | 1994 |
|                 | DENV-2 | Asian-I      | DQ181882 | Thailand | 1994 |
|                 | DENV-2 | Asian-I      | CG686542 | Thailand | 1994 |
|                 | DENV-2 | Asian-I      | DQ181800 | Thailand | 1995 |
|                 | DENV-2 | Asian-I      | DQ181849 | Thailand | 1995 |
|                 | DENV-2 | Asian-I      | DQ181881 | Thailand | 1995 |
|                 | DENV-2 | Asian-I      | DQ181866 | Thailand | 1996 |
|                 | DENV-2 | Asian-I      | DQ181879 | Thailand | 1996 |
|                 | DENV-2 | Asian-I      | CG686545 | Thailand | 1996 |
|                 | DENV-2 | Asian-I      | DQ181862 | Thailand | 1997 |
|                 | DENV-2 | Asian-I      | DQ181899 | Thailand | 1997 |
|                 | DENV-2 | Asian-I      | DQ181799 | Thailand | 1998 |
|                 | DENV-2 | Asian-I      | DQ181860 | Thailand | 1998 |
|                 | DENV-2 | Asian-I      | DQ181897 | Thailand | 1998 |
|                 | DENV-2 | Asian-I      | DQ181798 | Thailand | 1999 |
|                 | DENV-2 | Asian-I      | DQ181877 | Thailand | 1999 |
|                 | DENV-2 | Asian-I      | DQ181895 | Thailand | 1999 |
|                 | DENV-2 | Asian-I      | DQ181873 | Thailand | 2000 |
|                 | DENV-2 | Asian-I      | DQ181894 | Thailand | 2000 |
|                 | DENV-2 | Asian-I      | KY586654 | Thailand | 2000 |
|                 | DENV-2 | Asian-I      | DQ181871 | Thailand | 2001 |
|                 | DENV-2 | Asian-I      | EU117323 | Thailand | 2001 |
|                 | DENV-2 | Asian-I      | EU117336 | Thailand | 2001 |
|                 | DENV-2 | Asian-I      | EU117341 | Thailand | 2001 |
|                 | DENV-2 | Asian-I      | EU117351 | Thailand | 2001 |
|                 | DENV-2 | Asian-I      | KY586555 | Thailand | 2002 |
|                 | DENV-2 | Asian-I      | KY586604 | Thailand | 2002 |
|                 | DENV-2 | Asian-I      | KY586606 | Thailand | 2002 |
|                 | DENV-2 | Asian-I      | KY586678 | Thailand | 2002 |
|                 | DENV-2 | Asian-I      | JF898452 | Thailand | 2003 |
|                 | DENV-2 | Asian-I      | JF812102 | Thailand | 2003 |
|                 | DENV-2 | Asian-I      | KY586547 | Thailand | 2003 |
|                 | DENV-2 | Asian-I      | KY586562 | Thailand | 2003 |
|                 | DENV-2 | Asian-I      | KY586615 | Thailand | 2003 |
|                 | DENV-2 | Asian-I      | JQ993218 | Thailand | 2004 |
|                 | DENV-2 | Asian-I      | JQ993223 | Thailand | 2004 |
|                 | DENV-2 | Asian-I      | KY586598 | Thailand | 2004 |
|                 | DENV-2 | Asian-I      | KY586605 | Thailand | 2004 |
|                 | DENV-2 | Asian-I      | KY586612 | Thailand | 2004 |
|                 | DENV-2 | Asian-I      | JQ993217 | Thailand | 2005 |
|                 | DENV-2 | Asian-I      | JQ993226 | Thailand | 2005 |
|                 | DENV-2 | Asian-I      | KY586566 | Thailand | 2005 |
|                 | DENV-2 | Asian-I      | KY586590 | Thailand | 2005 |
|                 | DENV-2 | Asian-I      | KY586563 | Thailand | 2006 |
|                 | DENV-2 | Asian-I      | KY586565 | Thailand | 2006 |
|                 | DENV-2 | Asian-I      | KY586575 | Thailand | 2006 |
|                 | DENV-2 | Asian-I      | JN568273 | Thailand | 2007 |
|                 | DENV-2 | Asian-I      | KY586596 | Thailand | 2007 |
|                 | DENV-2 | Asian-I      | KY586567 | Thailand | 2008 |
|                 | DENV-2 | Asian-I      | KY586562 | Thailand | 2008 |
|                 | DENV-2 | Asian-I      | JF967990 | Thailand | 2009 |
|                 | DENV-2 | Asian-I      | KY586597 | Thailand | 2009 |
|                 | DENV-2 | Asian-I      | JF968033 | Thailand | 2010 |
|                 | DENV-2 | Asian-I      | JF968045 | Thailand | 2010 |
|                 | DENV-2 | Asian-I      | JN568245 | Thailand | 2010 |
|                 | DENV-2 | Asian-I      | KY586625 | Thailand | 2010 |
|                 | DENV-2 | Asian-I      | KF729020 | Thailand | 2011 |
|                 | DENV-2 | Asian-I      | KF729021 | Thailand | 2011 |
|                 | DENV-2 | Asian-I      | KF729022 | Thailand | 2011 |
|                 | DENV-2 | Asian-I      | KU509273 | Thailand | 2011 |
|                 | DENV-2 | Asian-I      | KY851468 | Thailand | 2012 |
|                 | DENV-2 | Asian-I      | KY851478 | Thailand | 2012 |
|                 | DENV-2 | Asian-I      | KY851496 | Thailand | 2012 |
|                 | DENV-2 | Asian-I      | KT781555 | Thailand | 2013 |
|                 | DENV-2 | Asian-I      | KY851466 | Thailand | 2013 |
|                 | DENV-2 | Asian-I      | KY851469 | Thailand | 2013 |
|                 | DENV-2 | Asian-I      | KY851502 | Thailand | 2013 |
|                 | DENV-2 | Asian-I      | KY882539 | Thailand | 2013 |
|                 | DENV-2 | Asian-I      | KT175135 | Thailand | 2014 |
|                 | DENV-2 | Asian-I      | KY147335 | Thailand | 2014 |
|                 | DENV-2 | Cosmopolitan | AF410377 | Thailand | 1998 |
|                 | DENV-2 | Cosmopolitan | KT781537 | Thailand | 2012 |
|                 | DENV-2 | Cosmopolitan | KT781538 | Thailand | 2012 |
|                 | DENV-2 | Cosmopolitan | KJ545481 | Thailand | 2013 |
|                 | DENV-2 | Cosmopolitan | KT781572 | Thailand | 2014 |
|                 | DENV-2 | Cosmopolitan | KT806317 | Thailand | 2014 |
|                 | DENV-2 | Cosmopolitan | KY495805 | Thailand | 2016 |

|                   |         |          |          |           |      |
|-------------------|---------|----------|----------|-----------|------|
| DENV-2<br>Asian-I | DENV-2  | Asian-I  | NC001474 | Thailand  | 1964 |
|                   | DENV-2  | Asian-I  | GU289914 | Thailand  | 1974 |
|                   | DENV-2  | Asian-I  | DQ181805 | Thailand  | 1979 |
|                   | DENV-2  | Asian-I  | DQ181804 | Thailand  | 1984 |
|                   | DENV-2  | Asian-I  | DQ181803 | Thailand  | 1985 |
|                   | DENV-2  | Asian-I  | DQ181802 | Thailand  | 1988 |
|                   | DENV-2  | Asian-I  | GQ868542 | Thailand  | 1994 |
|                   | DENV-2  | Asian-I  | DQ181800 | Thailand  | 1995 |
|                   | DENV-2  | Asian-I  | GQ868545 | Thailand  | 1996 |
|                   | DENV-2  | Asian-I  | DQ181799 | Thailand  | 1998 |
|                   | DENV-2  | Asian-I  | DQ181798 | Thailand  | 1998 |
|                   | DENV-2  | Asian-I  | KY586654 | Thailand  | 2000 |
|                   | DENV-2  | Asian-I  | DQ181797 | Thailand  | 2001 |
|                   | DENV-2  | Asian-I  | KY586606 | Thailand  | 2002 |
|                   | DENV-2  | Asian-I  | FJ898452 | Thailand  | 2003 |
|                   | DENV-2  | Asian-I  | KY586605 | Thailand  | 2004 |
|                   | DENV-2  | Asian-I  | KY586563 | Thailand  | 2006 |
|                   | DENV-2  | Asian-I  | JN568273 | Thailand  | 2007 |
|                   | DENV-2  | Asian-I  | JF967990 | Thailand  | 2009 |
|                   | DENV-2  | Asian-I  | JF968045 | Thailand  | 2010 |
|                   | DENV-2  | Asian-I  | KU509273 | Thailand  | 2011 |
|                   | DENV-2  | Asian-I  | KY851467 | Thailand  | 2012 |
|                   | DENV-2  | Asian-I  | KY822539 | Thailand  | 2013 |
|                   | DENV-2  | Asian-I  | KJ806920 | Malaysia  | 2013 |
|                   | DENV-2  | Asian-I  | KJ806930 | Malaysia  | 2014 |
|                   | DENV-2  | Asian-I  | KX224266 | Singapore | 2014 |
|                   | DENV-2  | Asian-I  | JN568261 | Australia | 2002 |
|                   | DENV-2  | Asian-I  | JN568249 | Australia | 2003 |
|                   | DENV-2  | Asian-I  | JN568246 | Australia | 2010 |
|                   | DENV-2  | Asian-I  | KT781555 | Australia | 2013 |
|                   | DENV-2  | Asian-I  | JQ815199 | China     | 2009 |
|                   | DENV-2  | Asian-I  | KF060920 | China     | 2012 |
|                   | DENV-2  | Asian-I  | MF459663 | China     | 2013 |
|                   | DENV-2  | Asian-I  | KP064517 | China     | 2014 |
|                   | DENV-2  | Asian-I  | KY849752 | Laos      | 2008 |
|                   | DENV-2  | Asian-I  | KY849757 | Laos      | 2009 |
|                   | DENV-2  | Asian-I  | KY849763 | Laos      | 2010 |
|                   | DENV-2  | Asian-I  | KY849768 | Laos      | 2010 |
|                   | DENV-2  | Asian-I  | LC147056 | Laos      | 2013 |
|                   | DENV-2  | Asian-I  | JF730044 | Cambodia  | 2001 |
|                   | DENV-2  | Asian-I  | KF921930 | Cambodia  | 2002 |
|                   | DENV-2  | Asian-I  | GQ868622 | Cambodia  | 2003 |
|                   | DENV-2  | Asian-I  | FJ839706 | Cambodia  | 2004 |
|                   | DENV-2  | Asian-I  | GQ868623 | Cambodia  | 2005 |
|                   | DENV-2  | Asian-I  | GU131927 | Cambodia  | 2007 |
|                   | DENV-2  | Asian-I  | GU131932 | Cambodia  | 2008 |
|                   | DENV-2  | Asian-I  | JF967986 | Cambodia  | 2009 |
|                   | DENV-2  | Asian-I  | KY495819 | Cambodia  | 2015 |
|                   | DENV-2  | Asian-I  | JF968026 | Myanmar   | 2010 |
|                   | DENV-2  | Asian-I  | KR051905 | Myanmar   | 2013 |
| DENV-2            | Asian-I | KT175136 | Myanmar  | 2014      |      |
| DENV-2            | Asian-I | KX357990 | Myanmar  | 2015      |      |
| DENV-2            | Asian-I | EU482782 | Viet Nam | 2003      |      |
| DENV-2            | Asian-I | EU482774 | Viet Nam | 2004      |      |
| DENV-2            | Asian-I | EU482777 | Viet Nam | 2005      |      |
| DENV-2            | Asian-I | EU482485 | Viet Nam | 2006      |      |
| DENV-2            | Asian-I | FJ205879 | Viet Nam | 2007      |      |
| DENV-2            | Asian-I | FJ461309 | Viet Nam | 2008      |      |
| DENV-2            | Asian-I | GU908495 | Viet Nam | 2009      |      |
| DENV-2            | Asian-I | JN376793 | Viet Nam | 2010      |      |
| DENV-2            | Asian-I | KY851484 | Viet Nam | 2011      |      |
| DENV-2            | Asian-I | KY851491 | Viet Nam | 2012      |      |
| DENV-2            | Asian-I | KT781567 | Viet Nam | 2014      |      |
| DENV-2            | Asian-I | KY851494 | Viet Nam | 2013      |      |

| DENV-2 Cosmopolitan | DENV-2 | Cosmopolitan | JN568248   | Australia        | 2003 |
|---------------------|--------|--------------|------------|------------------|------|
|                     | DENV-2 | Cosmopolitan | JN568252   | Australia        | 2008 |
|                     | DENV-2 | Cosmopolitan | JN568251   | Australia        | 2006 |
|                     | DENV-2 | Cosmopolitan | JN568250   | Australia        | 2004 |
|                     | DENV-2 | Cosmopolitan | JN568278   | Australia        | 2003 |
|                     | DENV-2 | Cosmopolitan | KY495804.1 | Australia        | 2016 |
|                     | DENV-2 | Cosmopolitan | JN036372   | Bangladesh       | 2009 |
|                     | DENV-2 | Cosmopolitan | JN036379   | Bangladesh       | 2005 |
|                     | DENV-2 | Cosmopolitan | JN036378   | Bangladesh       | 2007 |
|                     | DENV-2 | Cosmopolitan | JN036377   | Bangladesh       | 2008 |
|                     | DENV-2 | Cosmopolitan | JN036380   | Bangladesh       | 2006 |
|                     | DENV-2 | Cosmopolitan | KT781532   | Bangladesh       | 2011 |
|                     | DENV-2 | Cosmopolitan | EU056810   | Burkina Faso     | 1983 |
|                     | DENV-2 | Cosmopolitan | KY627762   | Burkina Faso     | 2016 |
|                     | DENV-2 | Cosmopolitan | KP191525   | China            | 2014 |
|                     | DENV-2 | Cosmopolitan | KU550338   | China            | 2015 |
|                     | DENV-2 | Cosmopolitan | KC964093   | China            | 2001 |
|                     | DENV-2 | Cosmopolitan | KC964094   | China            | 1993 |
|                     | DENV-2 | Cosmopolitan | JQ277886   | China            | 2005 |
|                     | DENV-2 | Cosmopolitan | KT751353   | China            | 2015 |
|                     | DENV-2 | Cosmopolitan | JX470186   | China            | 2010 |
|                     | DENV-2 | Cosmopolitan | FJ158608   | China            | 2007 |
|                     | DENV-2 | Cosmopolitan | KF069919   | China            | 2012 |
|                     | DENV-2 | Cosmopolitan | KJ807797   | China            | 2013 |
|                     | DENV-2 | Cosmopolitan | KX621247   | China            | 2015 |
|                     | DENV-2 | Cosmopolitan | LC310791.1 | Cote d'Ivoire    | 2017 |
|                     | DENV-2 | Cosmopolitan | JN568255   | East Timor       | 2002 |
|                     | DENV-2 | Cosmopolitan | JN568254   | East Timor       | 2000 |
|                     | DENV-2 | Cosmopolitan | KY275222   | East Timor       | 2001 |
|                     | DENV-2 | Cosmopolitan | KY495815   | East Timor       | 2003 |
|                     | DENV-2 | Cosmopolitan | JQ650022   | French Polynesia | 1996 |
|                     | DENV-2 | Cosmopolitan | JQ650026   | French Polynesia | 1997 |
|                     | DENV-2 | Cosmopolitan | JQ650027   | French Polynesia | 1998 |
|                     | DENV-2 | Cosmopolitan | KY782125   | French Polynesia | 2017 |
|                     | DENV-2 | Cosmopolitan | FJ538922   | India            | 1983 |
|                     | DENV-2 | Cosmopolitan | FJ538923   | India            | 1991 |
|                     | DENV-2 | Cosmopolitan | FJ538913   | India            | 1997 |
|                     | DENV-2 | Cosmopolitan | FJ538911   | India            | 1993 |
|                     | DENV-2 | Cosmopolitan | FJ538912   | India            | 1995 |
|                     | DENV-2 | Cosmopolitan | FJ538924   | India            | 1990 |
|                     | DENV-2 | Cosmopolitan | FJ538925   | India            | 1992 |
|                     | DENV-2 | Cosmopolitan | KX061431   | India            | 2015 |
|                     | DENV-2 | Cosmopolitan | DQ448236   | India            | 2000 |
|                     | DENV-2 | Cosmopolitan | KJ545475   | India            | 2013 |
|                     | DENV-2 | Cosmopolitan | JF967992   | India            | 2009 |
|                     | DENV-2 | Cosmopolitan | JQ955624   | India            | 2011 |
|                     | DENV-2 | Cosmopolitan | KU509271   | India            | 2006 |
|                     | DENV-2 | Cosmopolitan | KY495802   | India            | 2016 |
|                     | DENV-2 | Cosmopolitan | JN568260   | India            | 2003 |
|                     | DENV-2 | Cosmopolitan | FJ538905   | India            | 2004 |
|                     | DENV-2 | Cosmopolitan | FJ807633   | India            | 2005 |
|                     | DENV-2 | Cosmopolitan | KY427084   | India            | 2010 |
|                     | DENV-2 | Cosmopolitan | KT781565   | India            | 2014 |
|                     | DENV-2 | Cosmopolitan | GQ398261   | Indonesia        | 1976 |
|                     | DENV-2 | Cosmopolitan | GQ398260   | Indonesia        | 1976 |
|                     | DENV-2 | Cosmopolitan | GQ398258   | Indonesia        | 1975 |
|                     | DENV-2 | Cosmopolitan | GQ398259   | Indonesia        | 1976 |
|                     | DENV-2 | Cosmopolitan | GQ398262   | Indonesia        | 1976 |
|                     | DENV-2 | Cosmopolitan | LC027875   | Indonesia        | 2012 |
|                     | DENV-2 | Cosmopolitan | JN568242   | Indonesia        | 2009 |
|                     | DENV-2 | Cosmopolitan | KT012506   | Indonesia        | 2011 |
|                     | DENV-2 | Cosmopolitan | GQ398263   | Indonesia        | 1975 |
|                     | DENV-2 | Cosmopolitan | GQ398264   | Indonesia        | 1975 |
|                     | DENV-2 | Cosmopolitan | KC762678   | Indonesia        | 2010 |
|                     | DENV-2 | Cosmopolitan | JF967954   | Indonesia        | 2008 |
|                     | DENV-2 | Cosmopolitan | KC762672   | Indonesia        | 2008 |
|                     | DENV-2 | Cosmopolitan | KM216709   | Indonesia        | 2011 |
|                     | DENV-2 | Cosmopolitan | KC762668   | Indonesia        | 2008 |
|                     | DENV-2 | Cosmopolitan | KC762669   | Indonesia        | 2007 |
|                     | DENV-2 | Cosmopolitan | KJ184318   | Indonesia        | 2013 |
|                     | DENV-2 | Cosmopolitan | KT175123   | Indonesia        | 2014 |
|                     | DENV-2 | Cosmopolitan | KU529751   | Indonesia        | 2015 |
|                     | DENV-2 | Cosmopolitan | MG779194   | Kenya            | 2017 |
|                     | DENV-2 | Cosmopolitan | KT176076   | Kenya            | 2013 |
|                     | DENV-2 | Cosmopolitan | KJ806818   | Malaysia         | 2013 |
|                     | DENV-2 | Cosmopolitan | JF968028   | Malaysia         | 2010 |
|                     | DENV-2 | Cosmopolitan | KJ806776   | Malaysia         | 2013 |
|                     | DENV-2 | Cosmopolitan | KX452026   | Malaysia         | 2014 |
|                     | DENV-2 | Cosmopolitan | KJ806878   | Malaysia         | 2012 |
|                     | DENV-2 | Cosmopolitan | KY851456   | Malaysia         | 2011 |
|                     | DENV-2 | Cosmopolitan | KJ806773   | Malaysia         | 2005 |
|                     | DENV-2 | Cosmopolitan | KJ806774   | Malaysia         | 2007 |
|                     | DENV-2 | Cosmopolitan | JF967960   | Malaysia         | 2008 |
|                     | DENV-2 | Cosmopolitan | JQ650032   | New Caledonia    | 1997 |
|                     | DENV-2 | Cosmopolitan | JQ650036   | New Caledonia    | 1998 |
|                     | DENV-2 | Cosmopolitan | JQ650038   | New Caledonia    | 1999 |
|                     | DENV-2 | Cosmopolitan | KF041236   | Pakistan         | 2008 |
|                     | DENV-2 | Cosmopolitan | KF041235   | Pakistan         | 2009 |
|                     | DENV-2 | Cosmopolitan | KF360005   | Pakistan         | 2010 |
|                     | DENV-2 | Cosmopolitan | KM217157   | Pakistan         | 2011 |
|                     | DENV-2 | Cosmopolitan | KJ010186   | Pakistan         | 2013 |
|                     | DENV-2 | Cosmopolitan | KY495810.1 | Papua New Guinea | 2016 |
|                     | DENV-2 | Cosmopolitan | KY794785   | Papua New Guinea | 2010 |
|                     | DENV-2 | Cosmopolitan | KU517845   | Papua New Guinea | 2013 |
|                     | DENV-2 | Cosmopolitan | JN568263   | Philippines      | 2003 |
|                     | DENV-2 | Cosmopolitan | KF744397   | Philippines      | 2001 |
|                     | DENV-2 | Cosmopolitan | KU509277   | Philippines      | 2010 |
|                     | DENV-2 | Cosmopolitan | KU509269   | Philippines      | 2009 |
|                     | DENV-2 | Cosmopolitan | KJ946239   | Philippines      | 2008 |
|                     | DENV-2 | Cosmopolitan | KF744398   | Philippines      | 2005 |
|                     | DENV-2 | Cosmopolitan | KT175126   | Philippines      | 2014 |
|                     | DENV-2 | Cosmopolitan | KU517847   | Philippines      | 2015 |
|                     | DENV-2 | Cosmopolitan | KY851414   | Philippines      | 2012 |
|                     | DENV-2 | Cosmopolitan | KY851425   | Philippines      | 2013 |
|                     | DENV-2 | Cosmopolitan | AB194884   | Philippines      | 2004 |
|                     | DENV-2 | Cosmopolitan | LC416035.1 | Saudi Arabia     | 2018 |
|                     | DENV-2 | Cosmopolitan | MF314189   | Singapore        | 2016 |
|                     | DENV-2 | Cosmopolitan | GQ357716   | Singapore        | 2007 |
|                     | DENV-2 | Cosmopolitan | GQ357761   | Singapore        | 2008 |
|                     | DENV-2 | Cosmopolitan | JN380817   | Singapore        | 2009 |
|                     | DENV-2 | Cosmopolitan | JN544362   | Singapore        | 2011 |
|                     | DENV-2 | Cosmopolitan | JN030219   | Singapore        | 2010 |
|                     | DENV-2 | Cosmopolitan | GQ357785   | Singapore        | 2003 |
|                     | DENV-2 | Cosmopolitan | GQ357797   | Singapore        | 2004 |
|                     | DENV-2 | Cosmopolitan | JN544399   | Singapore        | 2011 |
|                     | DENV-2 | Cosmopolitan | KJ948303   | Singapore        | 2016 |
|                     | DENV-2 | Cosmopolitan | KX380818   | Singapore        | 2012 |
|                     | DENV-2 | Cosmopolitan | KY495808.1 | Solomon          | 2016 |
|                     | DENV-2 | Cosmopolitan | KC848581   | Somalia          | 2011 |
|                     | DENV-2 | Cosmopolitan | FJ882602   | Sri Lanka        | 1996 |
|                     | DENV-2 | Cosmopolitan | LC312197.1 | Sri Lanka        | 2017 |
|                     | DENV-2 | Cosmopolitan | KY495803.1 | Sri Lanka        | 2016 |
|                     | DENV-2 | Cosmopolitan | AB194883   | Sri Lanka        | 2004 |
|                     | DENV-2 | Cosmopolitan | GQ252676   | Sri Lanka        | 2003 |
|                     | DENV-2 | Cosmopolitan | EF016253   | Taiwan           | 2002 |
|                     | DENV-2 | Cosmopolitan | JQ403524   | Taiwan           | 2010 |
|                     | DENV-2 | Cosmopolitan | KT175112   | Taiwan           | 2012 |
|                     | DENV-2 | Cosmopolitan | KU385803   | Taiwan           | 2015 |
|                     | DENV-2 | Cosmopolitan | KT175114   | Taiwan           | 2013 |
|                     | DENV-2 | Cosmopolitan | MG189962   | Tanzania         | 2014 |
|                     | DENV-2 | Cosmopolitan | KT781566   | Thailand         | 2014 |
|                     | DENV-2 | Cosmopolitan | KJ545481.1 | Thailand         | 2013 |
|                     | DENV-2 | Cosmopolitan | KT781572   | Thailand         | 2015 |
|                     | DENV-2 | Cosmopolitan | AF410377.1 | Thailand         | 1998 |
|                     | DENV-2 | Cosmopolitan | KU59272    | Thailand         | 2000 |
|                     | DENV-2 | Cosmopolitan | KT781537   | Thailand         | 2012 |
|                     | DENV-2 | Cosmopolitan | KT781538.1 | Thailand         | 2012 |
|                     | DENV-2 | Cosmopolitan | KY495805.1 | Thailand         | 2016 |
|                     | DENV-2 | Cosmopolitan | KT806317   | Thailand         | 2014 |
|                     | DENV-2 | Cosmopolitan | KY782126.1 | Vanuatu          | 2017 |
|                     | DENV-2 | Cosmopolitan | KY971723   | Viet Nam         | 2015 |
|                     | DENV-2 | Cosmopolitan | KT781567   | Viet Nam         | 2011 |
|                     | DENV-2 | Cosmopolitan | EU482672   | Viet Nam         | 2006 |

| DENV-3 Thailand |     |            |          |      |  |  |
|-----------------|-----|------------|----------|------|--|--|
| DENV-3          | II  | AY676360   | Thailand | 1974 |  |  |
| DENV-3          | II  | AY676384   | Thailand | 1977 |  |  |
| DENV-3          | II  | AY676359   | Thailand | 1980 |  |  |
| DENV-3          | II  | AY676380   | Thailand | 1980 |  |  |
| DENV-3          | II  | AY676385   | Thailand | 1980 |  |  |
| DENV-3          | II  | AY676356   | Thailand | 1981 |  |  |
| DENV-3          | II  | AY676370   | Thailand | 1981 |  |  |
| DENV-3          | II  | AY676355   | Thailand | 1982 |  |  |
| DENV-3          | II  | KJ737430   | Thailand | 1983 |  |  |
| DENV-3          | II  | AY676358   | Thailand | 1983 |  |  |
| DENV-3          | II  | AY676372   | Thailand | 1983 |  |  |
| DENV-3          | II  | AY676371   | Thailand | 1984 |  |  |
| DENV-3          | II  | AY676401   | Thailand | 1984 |  |  |
| DENV-3          | II  | AY676368   | Thailand | 1985 |  |  |
| DENV-3          | II  | AY676415   | Thailand | 1985 |  |  |
| DENV-3          | II  | AY676418   | Thailand | 1985 |  |  |
| DENV-3          | II  | AY676354   | Thailand | 1985 |  |  |
| DENV-3          | II  | AY676374   | Thailand | 1986 |  |  |
| DENV-3          | II  | AY676352   | Thailand | 1987 |  |  |
| DENV-3          | II  | AY676353   | Thailand | 1987 |  |  |
| DENV-3          | II  | AY676362   | Thailand | 1987 |  |  |
| DENV-3          | II  | AY676378   | Thailand | 1987 |  |  |
| DENV-3          | II  | AY676379   | Thailand | 1987 |  |  |
| DENV-3          | II  | AY676417   | Thailand | 1988 |  |  |
| DENV-3          | II  | AY676419   | Thailand | 1988 |  |  |
| DENV-3          | II  | AY676361   | Thailand | 1990 |  |  |
| DENV-3          | II  | AY676421   | Thailand | 1990 |  |  |
| DENV-3          | II  | AY676367   | Thailand | 1991 |  |  |
| DENV-3          | II  | AY676416   | Thailand | 1991 |  |  |
| DENV-3          | II  | AY676386   | Thailand | 1992 |  |  |
| DENV-3          | II  | AY676350   | Thailand | 1993 |  |  |
| DENV-3          | II  | AY676351   | Thailand | 1993 |  |  |
| DENV-3          | II  | AY676357   | Thailand | 1993 |  |  |
| DENV-3          | II  | AY676375   | Thailand | 1993 |  |  |
| DENV-3          | II  | AY676381   | Thailand | 1993 |  |  |
| DENV-3          | II  | AY676494   | Thailand | 1994 |  |  |
| DENV-3          | II  | AY923865   | Thailand | 1994 |  |  |
| DENV-3          | II  | KJ737429   | Thailand | 1994 |  |  |
| DENV-3          | II  | AY676366   | Thailand | 1994 |  |  |
| DENV-3          | II  | AY676382   | Thailand | 1994 |  |  |
| DENV-3          | II  | AY676373   | Thailand | 1995 |  |  |
| DENV-3          | II  | AY676376   | Thailand | 1995 |  |  |
| DENV-3          | II  | AY676365   | Thailand | 1996 |  |  |
| DENV-3          | II  | AY676369   | Thailand | 1996 |  |  |
| DENV-3          | II  | AY676364   | Thailand | 1997 |  |  |
| DENV-3          | II  | AY676377   | Thailand | 1997 |  |  |
| DENV-3          | II  | AY676397   | Thailand | 1997 |  |  |
| DENV-3          | II  | AY676398   | Thailand | 1997 |  |  |
| DENV-3          | II  | AY676404   | Thailand | 1997 |  |  |
| DENV-3          | II  | AY676405   | Thailand | 1997 |  |  |
| DENV-3          | II  | AY676412   | Thailand | 1997 |  |  |
| DENV-3          | II  | DQ518661   | Thailand | 1997 |  |  |
| DENV-3          | II  | JN575574   | Thailand | 1997 |  |  |
| DENV-3          | II  | JN575575   | Thailand | 1997 |  |  |
| DENV-3          | II  | AY676348   | Thailand | 1998 |  |  |
| DENV-3          | II  | AY676349   | Thailand | 1998 |  |  |
| DENV-3          | II  | AY676388   | Thailand | 1998 |  |  |
| DENV-3          | II  | AY676389   | Thailand | 1998 |  |  |
| DENV-3          | II  | AY676391   | Thailand | 1998 |  |  |
| DENV-3          | II  | AY676392   | Thailand | 1998 |  |  |
| DENV-3          | II  | AY676393   | Thailand | 1998 |  |  |
| DENV-3          | II  | AY676395   | Thailand | 1998 |  |  |
| DENV-3          | II  | AY676396   | Thailand | 1998 |  |  |
| DENV-3          | II  | AY676399   | Thailand | 1998 |  |  |
| DENV-3          | II  | AY676400   | Thailand | 1998 |  |  |
| DENV-3          | II  | AY676403   | Thailand | 1998 |  |  |
| DENV-3          | II  | AY676406   | Thailand | 1998 |  |  |
| DENV-3          | II  | DQ518663   | Thailand | 1998 |  |  |
| DENV-3          | II  | AY676387   | Thailand | 1999 |  |  |
| DENV-3          | II  | AY676411   | Thailand | 1999 |  |  |
| DENV-3          | II  | AY676413   | Thailand | 1999 |  |  |
| DENV-3          | II  | AY676408   | Thailand | 2000 |  |  |
| DENV-3          | II  | AY676414   | Thailand | 2000 |  |  |
| DENV-3          | II  | FJ687448   | Thailand | 2001 |  |  |
| DENV-3          | II  | FJ744726   | Thailand | 2001 |  |  |
| DENV-3          | II  | FJ744727   | Thailand | 2001 |  |  |
| DENV-3          | II  | FJ744728   | Thailand | 2001 |  |  |
| DENV-3          | II  | FJ744729   | Thailand | 2001 |  |  |
| DENV-3          | II  | AY676394   | Thailand | 2001 |  |  |
| DENV-3          | II  | AY676402   | Thailand | 2001 |  |  |
| DENV-3          | II  | AY676407   | Thailand | 2001 |  |  |
| DENV-3          | II  | AY676409   | Thailand | 2001 |  |  |
| DENV-3          | II  | AY676410   | Thailand | 2001 |  |  |
| DENV-3          | II  | EU117353   | Thailand | 2001 |  |  |
| DENV-3          | II  | EU117354   | Thailand | 2001 |  |  |
| DENV-3          | II  | EU117356   | Thailand | 2001 |  |  |
| DENV-3          | II  | EU117358   | Thailand | 2001 |  |  |
| DENV-3          | II  | EU117364   | Thailand | 2001 |  |  |
| DENV-3          | II  | EU117369   | Thailand | 2001 |  |  |
| DENV-3          | II  | FJ744735   | Thailand | 2001 |  |  |
| DENV-3          | II  | FJ744740   | Thailand | 2001 |  |  |
| DENV-3          | II  | AY676383   | Thailand | 2002 |  |  |
| DENV-3          | II  | AY676420   | Thailand | 2002 |  |  |
| DENV-3          | II  | DQ518664   | Thailand | 2002 |  |  |
| DENV-3          | II  | DQ518660   | Thailand | 2003 |  |  |
| DENV-3          | II  | JQ993230   | Thailand | 2004 |  |  |
| DENV-3          | II  | JQ993228   | Thailand | 2005 |  |  |
| DENV-3          | II  | JF812103   | Thailand | 2006 |  |  |
| DENV-3          | II  | JF812104   | Thailand | 2006 |  |  |
| DENV-3          | II  | JF968084   | Thailand | 2009 |  |  |
| DENV-3          | II  | JF968093   | Thailand | 2010 |  |  |
| DENV-3          | II  | JF968094   | Thailand | 2010 |  |  |
| DENV-3          | II  | JN575576   | Thailand | 2010 |  |  |
| DENV-3          | II  | KT758740   | Thailand | 2011 |  |  |
| DENV-3          | II  | KT758741   | Thailand | 2011 |  |  |
| DENV-3          | II  | KT758742   | Thailand | 2011 |  |  |
| DENV-3          | II  | KT758748   | Thailand | 2012 |  |  |
| DENV-3          | II  | KT758790   | Thailand | 2013 |  |  |
| DENV-3          | II  | KT758791   | Thailand | 2013 |  |  |
| DENV-3          | II  | KY586820.1 | Thailand | 2008 |  |  |
| DENV-3          | III | KY586822.1 | Thailand | 2009 |  |  |
| DENV-3          | III | JF968092   | Thailand | 2010 |  |  |
| DENV-3          | III | JF968098   | Thailand | 2010 |  |  |
| DENV-3          | III | JF968106   | Thailand | 2010 |  |  |
| DENV-3          | III | KY586821.1 | Thailand | 2010 |  |  |
| DENV-3          | III | KT758771   | Thailand | 2013 |  |  |
| DENV-3          | III | KU509302   | Thailand | 2013 |  |  |
| DENV-3          | III | KY851612   | Thailand | 2013 |  |  |
| DENV-3          | III | KY851614   | Thailand | 2013 |  |  |
| DENV-3          | III | KY851616   | Thailand | 2013 |  |  |
| DENV-3          | III | KY851617   | Thailand | 2013 |  |  |
| DENV-3          | III | KY851618   | Thailand | 2013 |  |  |
| DENV-3          | III | KY851619   | Thailand | 2013 |  |  |
| DENV-3          | III | KY851621   | Thailand | 2013 |  |  |
| DENV-3          | III | KU509303.1 | Thailand | 2013 |  |  |
| DENV-3          | III | KP176708.1 | Thailand | 2013 |  |  |
| DENV-3          | III | KY851615.1 | Thailand | 2013 |  |  |
| DENV-3          | III | KY851613.1 | Thailand | 2013 |  |  |
| DENV-3          | III | KY851611.1 | Thailand | 2013 |  |  |
| DENV-3          | III | KU509304   | Thailand | 2014 |  |  |
| DENV-3          | III | KT758784   | Thailand | 2015 |  |  |
| DENV-3          | III | KY495823   | Thailand | 2015 |  |  |
| DENV-3          | III | MF142763   | Thailand | 2015 |  |  |

| DENV-3 genotype III | DENV-3 | III |          |                  |  |      |
|---------------------|--------|-----|----------|------------------|--|------|
|                     | DENV-3 | III | KC425219 | Brazil           |  | 2002 |
|                     | DENV-3 | III | JX669504 | Brazil           |  | 2006 |
|                     | DENV-3 | III | JX669499 | Brazil           |  | 2004 |
|                     | DENV-3 | III | JX669493 | Brazil           |  | 2005 |
|                     | DENV-3 | III | JX669490 | Brazil           |  | 2002 |
|                     | DENV-3 | III | JF808124 | Brazil           |  | 2003 |
|                     | DENV-3 | III | FJ898446 | Brazil           |  | 2001 |
|                     | DENV-3 | III | EF629368 | Brazil           |  | 1998 |
|                     | DENV-3 | III | EF629367 | Brazil           |  | 1997 |
|                     | DENV-3 | III | EF629366 | Brazil           |  | 1995 |
|                     | DENV-3 | III | AB111081 | Cambodia         |  | 2000 |
|                     | DENV-3 | III | KF954945 | China            |  | 2013 |
|                     | DENV-3 | III | JN662391 | China            |  | 2009 |
|                     | DENV-3 | III | MH544651 | Colombia         |  | 2016 |
|                     | DENV-3 | III | MH544647 | Colombia         |  | 2015 |
|                     | DENV-3 | III | KY951579 | Colombia         |  | 2012 |
|                     | DENV-3 | III | HM030558 | Colombia         |  | 2009 |
|                     | DENV-3 | III | GU131954 | Colombia         |  | 2006 |
|                     | DENV-3 | III | GU131950 | Colombia         |  | 2001 |
|                     | DENV-3 | III | GQ868578 | Colombia         |  | 2007 |
|                     | DENV-3 | III | GQ868577 | Colombia         |  | 2005 |
|                     | DENV-3 | III | GQ868575 | Colombia         |  | 2004 |
|                     | DENV-3 | III | FJ898443 | Colombia         |  | 2003 |
|                     | DENV-3 | III | KT726346 | Cuba             |  | 2002 |
|                     | DENV-3 | III | KT726340 | Cuba             |  | 2001 |
|                     | DENV-3 | III | KT187295 | Djibouti         |  | 2012 |
|                     | DENV-3 | III | KT187293 | Djibouti         |  | 2011 |
|                     | DENV-3 | III | FJ898457 | Ecuador          |  | 2000 |
|                     | DENV-3 | III | KU053472 | French Polynesia |  | 2013 |
|                     | DENV-3 | III | KU509281 | India            |  | 2009 |
|                     | DENV-3 | III | KU216208 | India            |  | 2013 |
|                     | DENV-3 | III | JQ922556 | India            |  | 2005 |
|                     | DENV-3 | III | JQ686080 | India            |  | 2010 |
|                     | DENV-3 | III | JQ686069 | India            |  | 1966 |
|                     | DENV-3 | III | KT187283 | Cote d'Ivoire    |  | 2008 |
|                     | DENV-3 | III | AB690859 | Japan            |  | 2010 |
|                     | DENV-3 | III | MF370228 | Laos             |  | 2013 |
|                     | DENV-3 | III | KF816163 | Laos             |  | 2013 |
|                     | DENV-3 | III | LT898503 | Malaysia         |  | 2011 |
|                     | DENV-3 | III | KP176709 | Malaysia         |  | 2013 |
|                     | DENV-3 | III | JF968111 | Malaysia         |  | 2010 |
|                     | DENV-3 | III | JF968068 | Malaysia         |  | 2008 |
|                     | DENV-3 | III | FJ898440 | Mexico           |  | 2003 |
|                     | DENV-3 | III | HM171540 | Mexico           |  | 2006 |
|                     | DENV-3 | III | FJ898442 | Mexico           |  | 2007 |
|                     | DENV-3 | III | FJ882575 | Mozambique       |  | 1985 |
|                     | DENV-3 | III | KF973486 | Nicaragua        |  | 2012 |
|                     | DENV-3 | III | GQ199864 | Nicaragua        |  | 2008 |
|                     | DENV-3 | III | FJ882576 | Nicaragua        |  | 1994 |
|                     | DENV-3 | III | KM217132 | Pakistan         |  | 2013 |
|                     | DENV-3 | III | KF041259 | Pakistan         |  | 2006 |
|                     | DENV-3 | III | KF041258 | Pakistan         |  | 2009 |
|                     | DENV-3 | III | KF041255 | Pakistan         |  | 2007 |
|                     | DENV-3 | III | KF041254 | Pakistan         |  | 2008 |
|                     | DENV-3 | III | JF808129 | Paraguay         |  | 2003 |
|                     | DENV-3 | III | JF808123 | Paraguay         |  | 2002 |
|                     | DENV-3 | III | HQ235027 | Paraguay         |  | 2007 |
|                     | DENV-3 | III | KJ189299 | Peru             |  | 2005 |
|                     | DENV-3 | III | KJ189295 | Peru             |  | 2006 |
|                     | DENV-3 | III | KJ189292 | Peru             |  | 2009 |
|                     | DENV-3 | III | KJ189286 | Peru             |  | 2008 |
|                     | DENV-3 | III | KJ189257 | Peru             |  | 2004 |
|                     | DENV-3 | III | KJ189256 | Peru             |  | 2002 |
|                     | DENV-3 | III | FJ547073 | Puerto Rico      |  | 2000 |
|                     | DENV-3 | III | FJ547070 | Puerto Rico      |  | 1998 |
|                     | DENV-3 | III | FJ547069 | Puerto Rico      |  | 1999 |
|                     | DENV-3 | III | FJ182010 | Puerto Rico      |  | 2005 |
|                     | DENV-3 | III | FJ024468 | Puerto Rico      |  | 2004 |
|                     | DENV-3 | III | EU482564 | Puerto Rico      |  | 2003 |
|                     | DENV-3 | III | KT187288 | Reunion          |  | 2012 |
|                     | DENV-3 | III | KJ830751 | Saudi Arabia     |  | 2014 |
|                     | DENV-3 | III | KU509282 | Senegal          |  | 2009 |
|                     | DENV-3 | III | KY921907 | Singapore        |  | 2015 |
|                     | DENV-3 | III | KX380842 | Singapore        |  | 2013 |
|                     | DENV-3 | III | GU370053 | Singapore        |  | 2007 |
|                     | DENV-3 | III | EU081182 | Singapore        |  | 2005 |
|                     | DENV-3 | III | EU081181 | Singapore        |  | 2004 |
|                     | DENV-3 | III | KC848589 | Somalia          |  | 2011 |
|                     | DENV-3 | III | KX518579 | Sri Lanka        |  | 2003 |
|                     | DENV-3 | III | KX518576 | Sri Lanka        |  | 2004 |
|                     | DENV-3 | III | KU509283 | Sri Lanka        |  | 2006 |
|                     | DENV-3 | III | KF855474 | Sri Lanka        |  | 1989 |
|                     | DENV-3 | III | GQ252674 | Sri Lanka        |  | 1997 |
|                     | DENV-3 | III | GQ199887 | Sri Lanka        |  | 1983 |
|                     | DENV-3 | III | FJ882573 | Sri Lanka        |  | 1993 |
|                     | DENV-3 | III | FJ189449 | Sri Lanka        |  | 1990 |
|                     | DENV-3 | III | AY099336 | Sri Lanka        |  | 2000 |
|                     | DENV-3 | III | KP176715 | Taiwan           |  | 2012 |
|                     | DENV-3 | III | KP176714 | Taiwan           |  | 2011 |
|                     | DENV-3 | III | DQ675533 | Taiwan           |  | 1999 |
|                     | DENV-3 | III | AB549332 | Tanzania         |  | 2010 |
|                     | DENV-3 | III | KY851612 | Thailand         |  | 2013 |
|                     | DENV-3 | III | KY495823 | Thailand         |  | 2015 |
|                     | DENV-3 | III | KU509304 | Thailand         |  | 2014 |
|                     | DENV-3 | III | KU509302 | Thailand         |  | 2013 |
|                     | DENV-3 | III | KT758784 | Thailand         |  | 2015 |
|                     | DENV-3 | III | KT758771 | Thailand         |  | 2013 |
|                     | DENV-3 | III | KP176707 | Thailand         |  | 2012 |
|                     | DENV-3 | III | JF968106 | Thailand         |  | 2010 |
|                     | DENV-3 | III | GQ868586 | Venezuela        |  | 2007 |
|                     | DENV-3 | III | FJ639800 | Venezuela        |  | 2004 |
|                     | DENV-3 | III | KP176711 | Viet Nam         |  | 2013 |
