# Supplementary material for: Emergence of genotype Cosmopolitan of dengue virus type 2 and genotype III of dengue virus type 3 in Thailand
Source: PubMed Central journal article supplement (PMC6231660; doi:10.1371/journal.pone.0207220), 2018-11-12
Supplement: pone.0207220.s003.pdf [file pone.0207220.s003.pdf]

S3 Table. Dengue virus complete coding sequences used in the present study.

| Dataset                | Serotype               | Genotype     | Lineage | Accession Number | Country          | Year   |      |
|------------------------|------------------------|--------------|---------|------------------|------------------|--------|------|
| DENV-2<br>Cosmopolitan | DENV-2                 | Cosmopolitan | C       | KX372564         | Australia        | 2015   |      |
|                        | DENV-2                 | Cosmopolitan | A       | EU056810         | Burkina Faso     | 1983   |      |
|                        | DENV-2                 | Cosmopolitan | A       | GU131843         | Burkina Faso     | 1986   |      |
|                        | DENV-2                 | Cosmopolitan | A       | KY627762         | Burkina Faso     | 2016   |      |
|                        | DENV-2                 | Cosmopolitan | B       | AF276619         | China            | 2000   |      |
|                        | DENV-2                 | Cosmopolitan | B       | AF359579         | China            | 1999   |      |
|                        | DENV-2                 | Cosmopolitan | C       | JX470186         | China            | 2010   |      |
|                        | DENV-2                 | Cosmopolitan | C       | KC131142         | China            | 2012   |      |
|                        | DENV-2                 | Cosmopolitan | C       | KP012546         | China            | 2014   |      |
|                        | DENV-2                 | Cosmopolitan | C       | KX621247         | China            | 2015   |      |
|                        | DENV-2                 | Cosmopolitan | C       | HM488257         | Guam             | 2001   |      |
|                        | DENV-2                 | Cosmopolitan | B       | DQ448231         | India            | 2001   |      |
|                        | DENV-2                 | Cosmopolitan | B       | FJ898454         | India            | 2006   |      |
|                        | DENV-2                 | Cosmopolitan | B       | JQ955623         | India            | 2009   |      |
|                        | DENV-2                 | Cosmopolitan | B       | JQ955624         | India            | 2011   |      |
|                        | DENV-2                 | Cosmopolitan | C       | AB189122         | Indonesia        | 1998   |      |
|                        | DENV-2                 | Cosmopolitan | A       | GQ398258         | Indonesia        | 1975   |      |
|                        | DENV-2                 | Cosmopolitan | A       | GQ398259         | Indonesia        | 1976   |      |
|                        | DENV-2                 | Cosmopolitan | A       | GQ398260         | Indonesia        | 1976   |      |
|                        | DENV-2                 | Cosmopolitan | C       | AY858035         | Indonesia        | 2004   |      |
|                        | DENV-2                 | Cosmopolitan | C       | KC762676         | Indonesia        | 2007   |      |
|                        | DENV-2                 | Cosmopolitan | C       | KC762670         | Indonesia        | 2007   |      |
|                        | DENV-2                 | Cosmopolitan | C       | KC762672         | Indonesia        | 2008   |      |
|                        | DENV-2                 | Cosmopolitan | C       | KU509268         | Indonesia        | 2009   |      |
|                        | DENV-2                 | Cosmopolitan | C       | KC762680         | Indonesia        | 2010   |      |
|                        | DENV-2                 | Cosmopolitan | C       | KU517846         | Indonesia        | 2014   |      |
|                        | DENV-2                 | Cosmopolitan | C       | KX452026         | Malaysia         | 2014   |      |
|                        | DENV-2                 | Cosmopolitan | B       | KF041236         | Pakistan         | 2008   |      |
|                        | DENV-2                 | Cosmopolitan | B       | KF360005         | Pakistan         | 2010   |      |
|                        | DENV-2                 | Cosmopolitan | B       | KJ010186         | Pakistan         | 2013   |      |
|                        | DENV-2                 | Cosmopolitan | C       | KU517845         | Papua New Guinea | 2013   |      |
|                        | DENV-2                 | Cosmopolitan | C       | KU509269         | Philippines      | 2009   |      |
|                        | DENV-2                 | Cosmopolitan | C       | KU509277         | Philippines      | 2010   |      |
|                        | DENV-2                 | Cosmopolitan | C       | KU517847         | Philippines      | 2015   |      |
|                        | DENV-2                 | Cosmopolitan | B       | KJ830750         | Saudi Arabia     | 2014   |      |
|                        | DENV-2                 | Cosmopolitan | C       | JN851131         | Singapore        | 2005   |      |
|                        | DENV-2                 | Cosmopolitan | C       | KM279580         | Singapore        | 2013   |      |
|                        | DENV-2                 | Cosmopolitan | C       | KM279604         | Singapore        | 2008   |      |
|                        | DENV-2                 | Cosmopolitan | C       | KU948303         | Singapore        | 2016   |      |
|                        | DENV-2                 | Cosmopolitan | C       | KY921904         | Singapore        | 2014   |      |
|                        | DENV-2                 | Cosmopolitan | B       | FJ882602         | Sri Lanka        | 1996   |      |
|                        | DENV-2                 | Cosmopolitan | B       | GQ252676         | Sri Lanka        | 2003   |      |
|                        | DENV-2                 | Cosmopolitan | B       | GQ252677         | Sri Lanka        | 2004   |      |
|                        | DENV-2                 | Cosmopolitan | C       | DQ645546         | Taiwan           | 2002   |      |
|                        | DENV-2                 | Cosmopolitan | C       | KU365902         | Taiwan           | 2015   |      |
|                        | DENV-2                 | Cosmopolitan | C       | KU509272         | Thailand         | 2009   |      |
|                        | DENV-2                 | Cosmopolitan | C       | EU482672         | Vietnam          | 2006   |      |
|                        | DENV-3<br>genotype III | DENV-3       | III     | B                | JX669508         | Brazil | 2006 |
|                        |                        | DENV-3       | III     | B                | JF808120         | Brazil | 2009 |
|                        |                        | DENV-3       | III     | B                | JX669490         | Brazil | 2002 |
| DENV-3                 |                        | III          | C       | KF954945         | China            | 2013   |      |
| DENV-3                 |                        | III          | C       | JN662391         | China            | 2009   |      |
| DENV-3                 |                        | III          | B       | GQ868577         | Colombia         | 2005   |      |
| DENV-3                 |                        | III          | B       | KT726346         | Cuba             | 2002   |      |
| DENV-3                 |                        | III          | B       | KT726340         | Cuba             | 2001   |      |
| DENV-3                 |                        | III          | C       | KU216208         | India            | 2013   |      |
| DENV-3                 |                        | III          | C       | GQ466079         | India            | 2008   |      |
| DENV-3                 |                        | III          | C       | KU509281         | India            | 2009   |      |
| DENV-3                 |                        | III          | C       | FJ644564         | India            | 2007   |      |
| DENV-3                 |                        | III          | C       | KU509286         | India            | 2011   |      |
| DENV-3                 |                        | III          | C       | JQ922556         | India            | 2005   |      |
| DENV-3                 |                        | III          | C       | MF370226         | Laos             | 2013   |      |
| DENV-3                 |                        | III          | B       | AY099337         | Martinique       | 1999   |      |
| DENV-3                 |                        | III          | B       | FJ898442         | Mexico           | 2007   |      |
| DENV-3                 |                        | III          | B       | KF973486         | Nicaragua        | 2012   |      |
| DENV-3                 |                        | III          | B       | GQ199864         | Nicaragua        | 2008   |      |
| DENV-3                 |                        | III          | B       | FJ882576         | Nicaragua        | 1994   |      |
| DENV-3                 |                        | III          | C       | KF041258         | Pakistan         | 2009   |      |
| DENV-3                 |                        | III          | C       | KF041254         | Pakistan         | 2008   |      |
| DENV-3                 |                        | III          | C       | KF041255         | Pakistan         | 2007   |      |
| DENV-3                 |                        | III          | C       | KF041259         | Pakistan         | 2006   |      |
| DENV-3                 |                        | III          | B       | JF808129         | Paraguay         | 2003   |      |
| DENV-3                 |                        | III          | B       | KJ189286         | Peru             | 2008   |      |
| DENV-3                 |                        | III          | B       | KJ189265         | Peru             | 2004   |      |
| DENV-3                 |                        | III          | B       | EU482564         | Puerto Rico      | 2003   |      |
| DENV-3                 |                        | III          | B       | EU596494         | Puerto Rico      | 2007   |      |
| DENV-3                 |                        | III          | A       | KJ830751         | Saudi Arabia     | 2014   |      |
| DENV-3                 |                        | III          | C       | KU509282         | Senegal          | 2009   |      |
| DENV-3                 |                        | III          | C       | KY921907         | Singapore        | 2015   |      |
| DENV-3                 |                        | III          | C       | KX380842         | Singapore        | 2013   |      |
| DENV-3                 |                        | III          | A       | EU081181         | Singapore        | 2004   |      |
| DENV-3                 |                        | III          | A       | GU370053         | Singapore        | 2007   |      |
| DENV-3                 |                        | III          | A       | EU081182         | Singapore        | 2005   |      |
| DENV-3                 |                        | III          | A       | KF955474         | Sri Lanka        | 1989   |      |
| DENV-3                 |                        | III          | A       | GQ252674         | Sri Lanka        | 1997   |      |
| DENV-3                 |                        | III          | A       | GQ199887         | Sri Lanka        | 1983   |      |
| DENV-3                 |                        | III          | A       | FJ882573         | Sri Lanka        | 1993   |      |
| DENV-3                 |                        | III          | A       | AY099336         | Sri Lanka        | 2000   |      |
| DENV-3                 |                        | III          | A       | KU509283         | Sri Lanka        | 2006   |      |
| DENV-3                 |                        | III          | A       | DQ675533         | Taiwan           | 1999   |      |
| DENV-3                 |                        | III          | C       | MF142763         | Thailand         | 2015   |      |
| DENV-3                 |                        | III          | B       | GQ868586         | Venezuela        | 2007   |      |
| DENV-3                 |                        | III          | B       | FJ639800         | Venezuela        | 2004   |      |
