# Supplementary material for: Emergence of genotype Cosmopolitan of dengue virus type 2 and genotype III of dengue virus type 3 in Thailand
Source: PubMed Central journal article supplement (PMC6231660; doi:10.1371/journal.pone.0207220), 2018-11-12
Supplement: pone.0207220.s004.pdf [file pone.0207220.s004.pdf]

**S4 Table. Model comparison using path and stepping-stone sampling.**

| Data set          | Model combinations     | Path sampling           |         | Stepping-stone sampling |         |
|-------------------|------------------------|-------------------------|---------|-------------------------|---------|
|                   |                        | Log Marginal likelihood | Ranking | Log Marginal likelihood | Ranking |
| DENV-2            | UCLN, Constant         | -6283.15                | 4       | -6283.36                | 4       |
| Asian-I           | UCLN, Exponential      | -6281.1                 | 3       | -6281.63                | 2       |
| Envelope Sequence | UCLN, Bayesian Skyline | -6276.8                 | 1       | -6277                   | 1       |
|                   | UCLN, GMRF             | -6281.08                | 2       | -6281.82                | 3       |
| DENV-2            | UCLN, Constant         | -10518.06               | 4       | -10520.29               | 4       |
| Cosmopolitan      | UCLN, Exponential      | -10504.84               | 3       | -10508.58               | 3       |
| Envelope Sequence | UCLN, Bayesian Skyline | -10496.8                | 2       | -10501.42               | 2       |
|                   | UCLN, GMRF             | -10476.76               | 1       | -10478.4                | 1       |
| DENV-3            | UCLN, Constant         | -6947.39                | 3       | -6947.78                | 3       |
| Genotype III      | UCLN, Exponential      | -6942.25                | 2       | -6942.27                | 2       |
| Envelope Sequence | UCLN, Bayesian Skyline | -6936.4                 | 1       | -6938.03                | 1       |
|                   | UCLN, GMRF             | -6951.28                | 4       | -6952.62                | 4       |
