# Supplementary material for: Emergence of genotype Cosmopolitan of dengue virus type 2 and genotype III of dengue virus type 3 in Thailand
Source: PubMed Central journal article supplement (PMC6231660; doi:10.1371/journal.pone.0207220), 2018-11-12
Supplement: pone.0207220.s005.pdf [file pone.0207220.s005.pdf]

S1 Fig

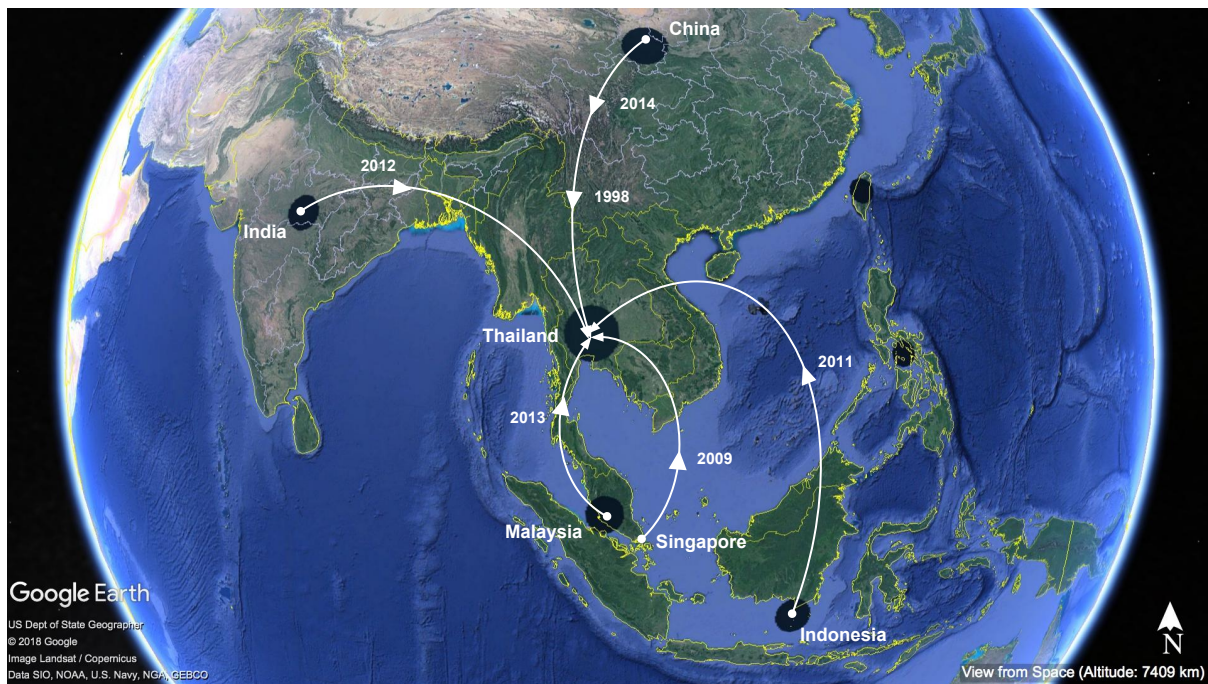

**S1 Fig. The migrations of temporal dynamic for DENV-2 genotype Cosmopolitan to Thailand.** The visualizing location annotated Maximum Clade Credibility tree reconstruction by SPREAD software. The branches express an overview of the possible routes of DENV-2 Cosmopolitan introduction into Thailand. The spread time and direction of the virus from China, India, Singapore, Malaysia, and Indonesia to Thailand is indicated with arrows. Map data: Google Earth Pro.
