# Supplementary material for: Emergence of genotype Cosmopolitan of dengue virus type 2 and genotype III of dengue virus type 3 in Thailand
Source: PubMed Central journal article supplement (PMC6231660; doi:10.1371/journal.pone.0207220), 2018-11-12
Supplement: pone.0207220.s006.pdf [file pone.0207220.s006.pdf]

**S2 Fig**

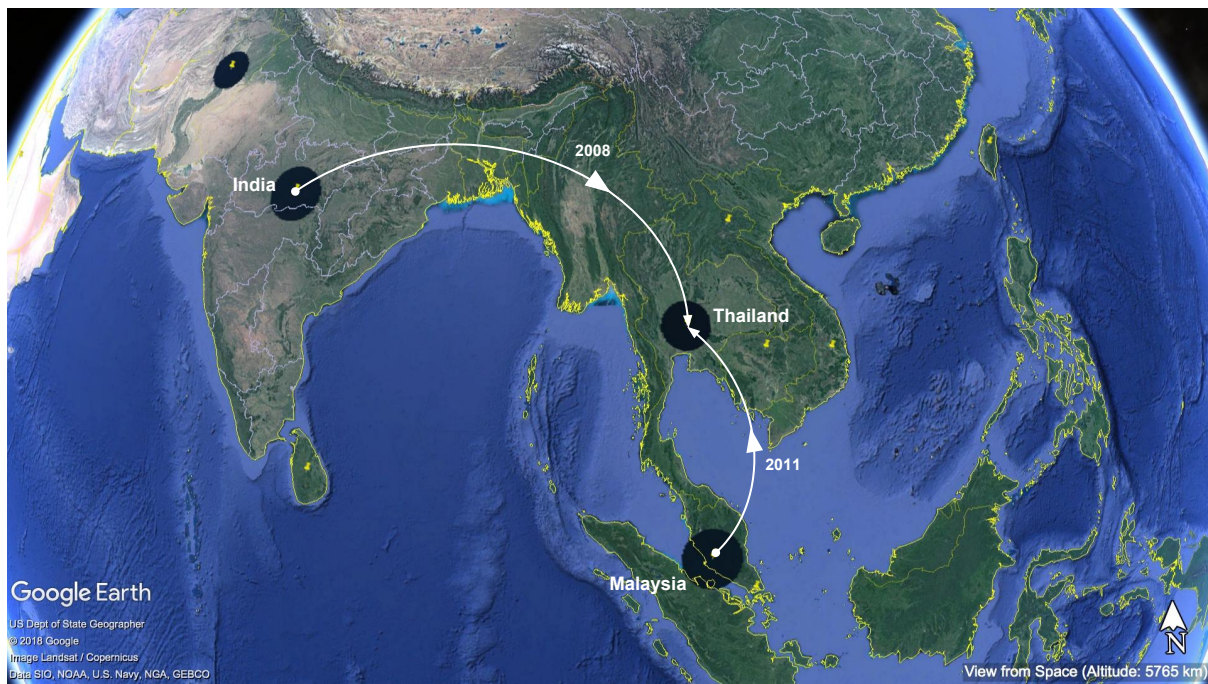

**S2 Fig. The migrations of temporal dynamics for DENV-3 genotype III to Thailand.** The visualizing location annotated Maximum Clade Credibility tree reconstruction by SPREAD software. The branches express an overview of the possible routes of DENV-3 genotype III introduction into Thailand. The spread time and direction of virus from India and Malaysia is indicated with arrows. Map data: Google Earth Pro.
