# Supplementary material for: Emergence of genotype Cosmopolitan of dengue virus type 2 and genotype III of dengue virus type 3 in Thailand
Source: PubMed Central journal article supplement (PMC6231660; doi:10.1371/journal.pone.0207220), 2018-11-12
Supplement: pone.0207220.s008.pdf [file pone.0207220.s008.pdf]

S4 Fig

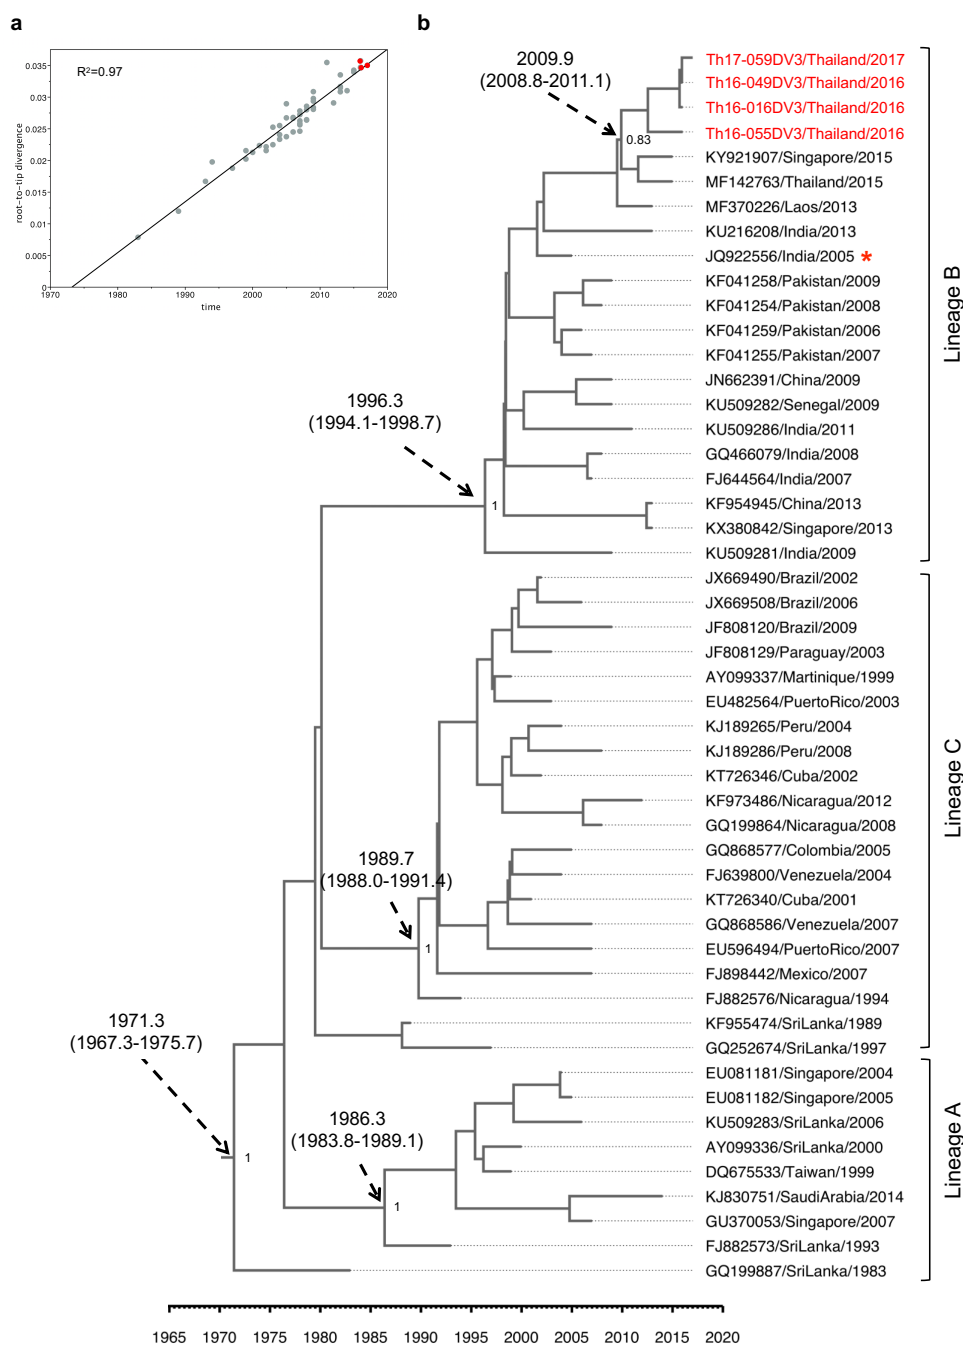

**S4 Fig. Molecular clock analysis of DENV-3 genotype III complete coding sequence.** The dataset of DENV-3 genotype III was composed of 4 sequences obtained in the present study and 46 sequences retrieved from GenBank (S3 Table). **(a)** Correlation of collection year and divergence from maximum likelihood tree.  $R^2$ , coefficient of determination = 0.97 was estimated using TempEst (shown in top left). Sequences obtained in the present study are shown as red dots. **(b)** Bayesian maximum clade credibility (MCC) phylogenetic tree estimated using BEAST v1.8.4. The mean time of the most recent common ancestor (tMRCA) and 95% highest probability density (HPD) are indicated with black dashed arrows shown in year, and posterior probability values are indicated adjacent to the node of interest. The name of each taxa represent in order of accession number, country, and year of collection. Sequences obtained in the present study are labeled in red. Lineages A, B, and C are shown to the right. The JQ922556 virus is indicated by a red asterisk.
